# Supplementary material
Source: PubMed Central journal article supplement (PMC3488040)

## Supplemental materials

**Fig. S1.** Golgi targeting of C2GnT-M and C1GalT1 did not require Sar1a or Sar1b. (A,B) Confocal immunofluorescence images of Panc1-bC2GnT-M-c-Myc cells labeled with green (anti-c-Myc or anti-C1GalT1 Abs) and red (anti-Sar1a and anti-Sar1b Abs) fluorescence in cells treated with scramble siRNA. (C–F) Images of cells labeled with green (anti-c-Myc or anti-C1GalT1 Abs) and red (anti-Giantin and anti-Sar1 Abs) fluorescence in cells treated with Sar1a or Sar1b siRNA. Scale bar, 10  $\mu$ m. (G) Sar1a and Sar1b western blots of the lysates of cells treated with scramble, Sar1a, or Sar1b siRNA, respectively.  $\beta$ -actin was used as a loading control. (H) Quantification of C2GnT-M and C1GalT1 immunofluorescence signal of non-Golgi vs. Golgi (=100%) in cells treated with scramble or protein-specific siRNA.

**Fig. S2.**  $\beta$ -COP depletion did not prevent Golgi targeting of C1GalT1. Panc1-bC2GnT-M-c-Myc cells were transfected with scramble or  $\beta$ -COP-specific siRNA. After 3 d, confocal immunofluorescence microscopy images were analyzed for colocalization of C1GalT1 with Giantin (A) or with  $\beta$ -COP (B). White boxes indicate areas enlarged and shown in the inset. Scale bar, 10  $\mu$ m. (C) Quantification of C1GalT1 immunofluorescence signal of non-Golgi vs. Golgi (=100%) in cells treated with scramble or  $\beta$ -COP-siRNA. (D)  $\beta$ -COP western blots of the lysates of cells treated with scramble or  $\beta$ -COP siRNA.  $\beta$ -actin was used as a loading control.

**Movie S1.** Time lapse images of C2GnT-M-GFP and C1GalT1-RFP in live HEK293 cells. The C2GnT-M-GFP and C1GalT1-RFP spots were originated from opposite sides of cell periphery, and moved toward and fused with the Golgi at 73.67 s. For simplicity, the speed of movie has been increased.

**Movie S2.** The fluorescence recovery of C2GnT-M-GFP after photobleaching. This movie shows the images of fluorescence signal recorded every 8 s. Complete restoration of C2GnT-M-GFP fluorescence was detected at 168 s. For simplicity, the speed of movie has been increased.

**Movie S3.** The fluorescence recovery of C1GalT1-RFP after photobleaching. This movie shows the images of fluorescence signal recorded every 8 s. Complete restoration of C1GalT1-RFP fluorescence was detected at 240 s. For simplicity, the speed of movie has been increased.

Figure S1.

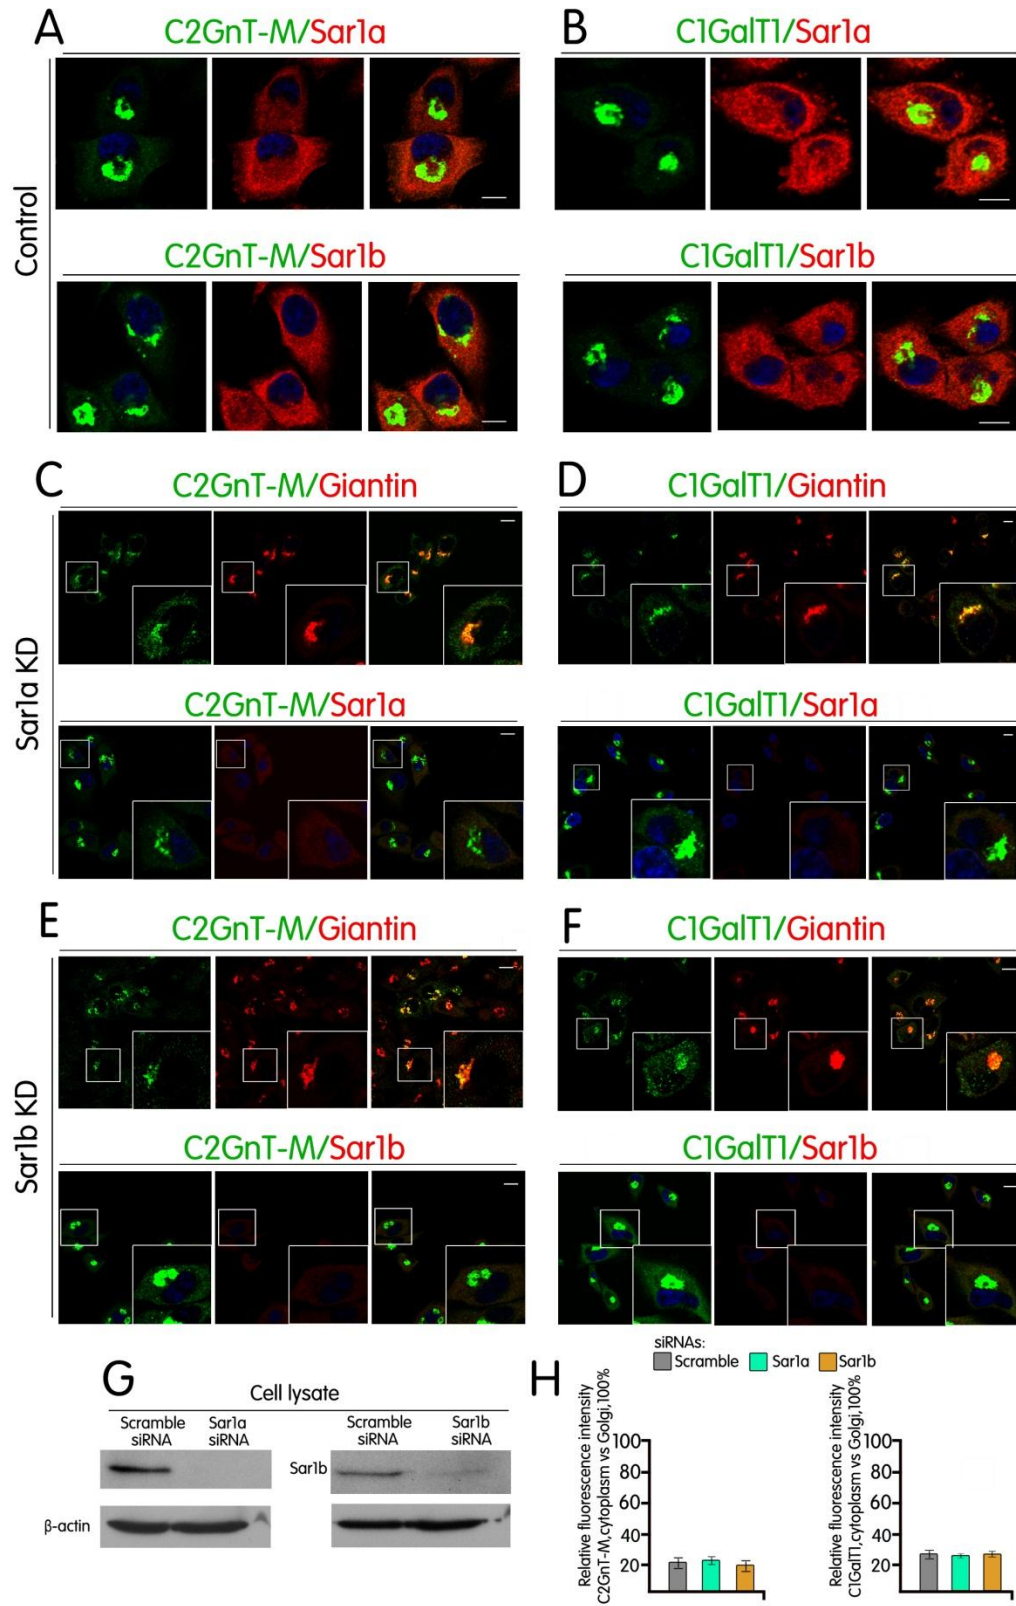

Figure S2.

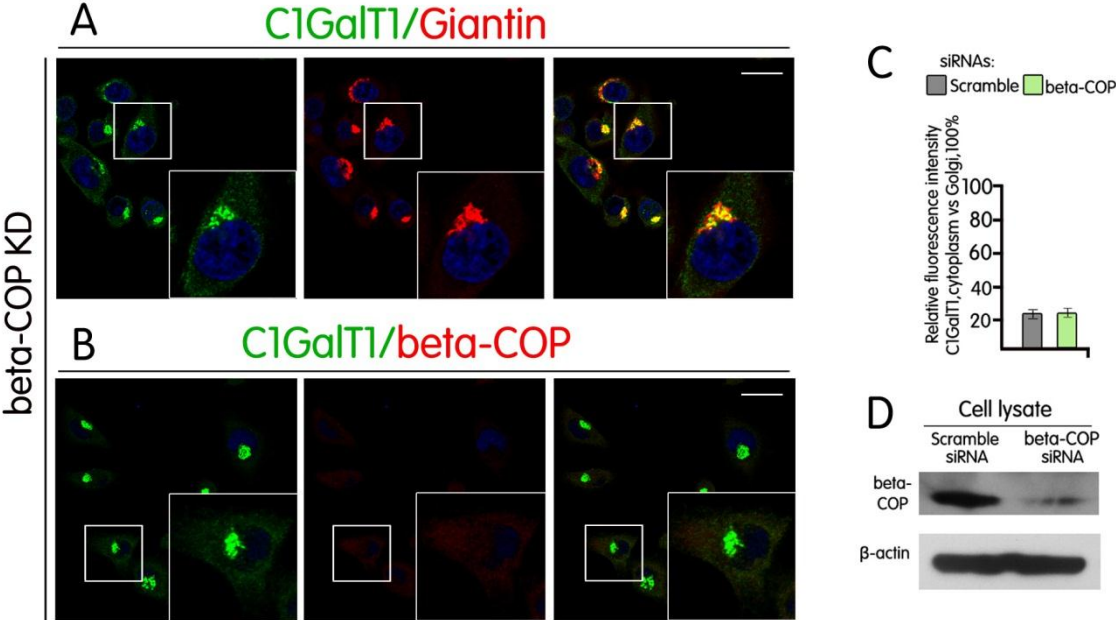

Supplement: supp_C112.403006_jbc.C112.403006-1.pdf [file supp_C112.403006_jbc.C112.403006-1.pdf]
